# Supplementary material for: Revealing the Complexity of Sweepovirus-Deltasatellite–Plant Host Interactions: Expanded Natural and Experimental Helper Virus Range and Effect Dependence on Virus-Host Combination
Source: MDPI journal article supplement (doi:10.3390/microorganisms9051018), 2021-05-10
Supplement: s1 [file s1]

# Revealing the Complexity of Sweepovirus-Deltasatellite-Plant Host Interactions: Expanded Natural and Experimental Helper Virus Range and Effect Dependence on Virus-Host Combination

Camila G. Ferro, F. Murilo Zerbini, Jesús Navas-Castillo and Elvira Fiallo-Olivé

## Supplementary Materials

**Figure S1:** Color-coded matrix of pairwise sequence identity scores generated by alignment of the full-length genomes of the sweepoviruses obtained in this work.

**Figure S2:** Recombination analysis using RDP4 package of the sweepovirus genomes obtained in this work.

**Figure S3:** Color-coded matrix of pairwise sequence identity scores generated by alignment of the full-length genomes of the deltasatellites obtained in this work.

**Figure S4:** DNA hybridization of petiole cross section blots of newly emerged young leaves of *Nicotiana benthamiana* plants agroinoculated with ToLCNDV, SiGYVV, ToLDeV or BCTV alone or in combination with SPLCD1.

**Figure S5:** DNA hybridization of petiole cross section blots of newly emerged young leaves of zucchini plants agroinoculated with ToLCNDV and SPLCD1.

**Table S1:** Information of the *Ipomoea indica* samples used in this study.

**Table S2:** Sweepovirus sequences retrieved from GenBank used for pairwise sequence identity, phylogenetic and recombination analyses.

**Table S3:** Deltasatellite sequences retrieved from GenBank used for pairwise sequence identity, phylogenetic and recombination analyses.

**Table S4:** List of primers used for real-time PCR to amplify the deltasatellite and viral DNA or plant reference genes.

**Table S5:** Estimate of the coefficient of evolutionary differentiation for SPLCV and SPLCD1 genomes obtained in this work and isolates previously reported from Spain.

**Table S6:** Data of virus quantification by real-time PCR ( $2^{-\Delta\Delta C_t}$ ) used to generate Figure 7 with Graphpad Prism 6.0 software.

**Table S7:** Summary of statistical analyses performed to evaluate the effect of SPLCD1 on accumulation of helper geminivirids.

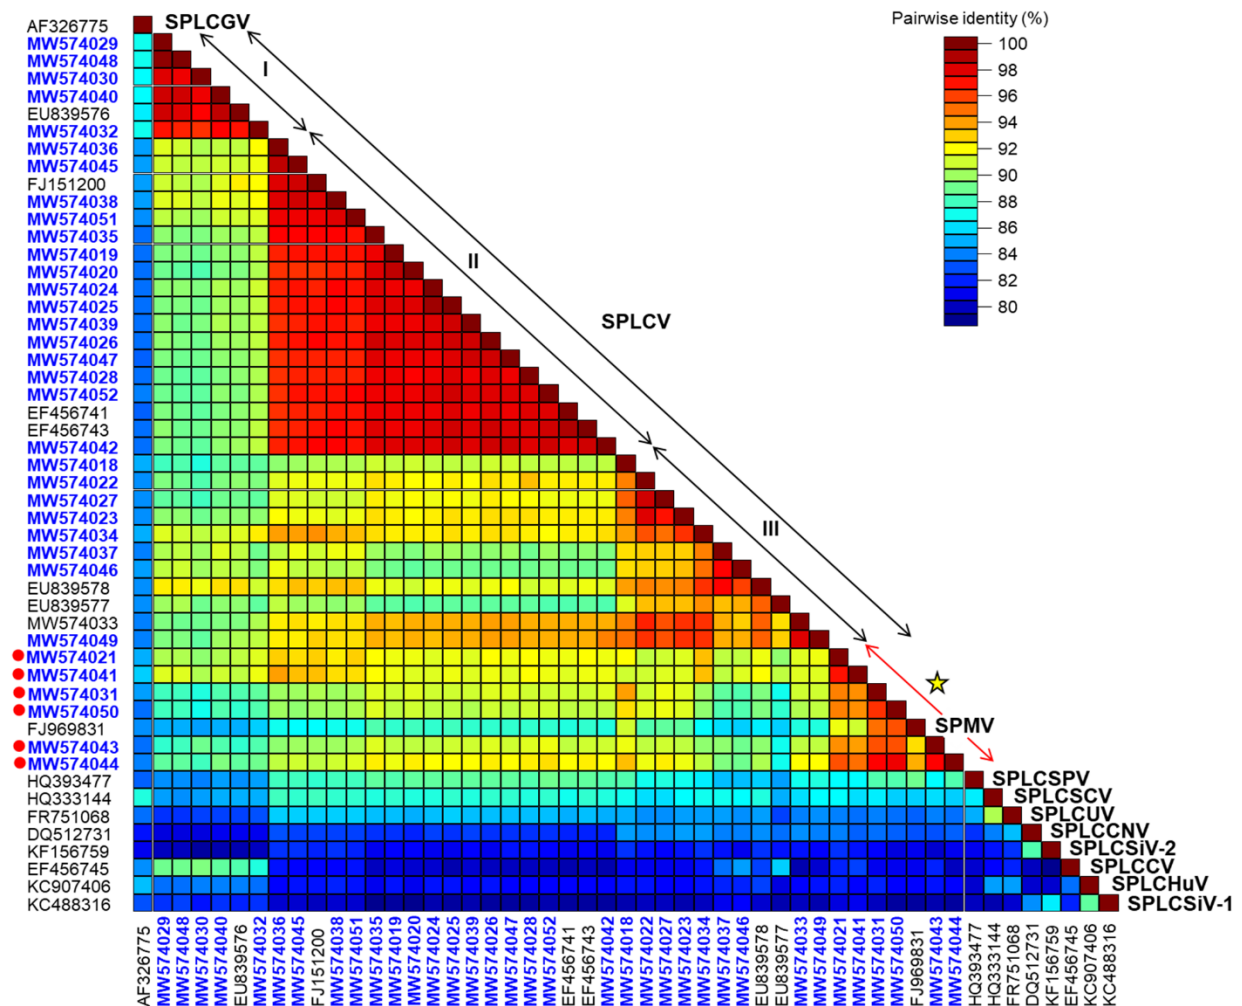

**Figure S1.** Color-coded matrix of pairwise sequence identity scores generated by alignment of the full-length genomes of the sweepoviruses obtained in this work (highlighted in blue), closely related sweet potato leaf curl virus (SPLCV) isolates previously reported from Spain and one representative isolate of all other sweepovirus species. I to III represent subgroups within the group of SPLCV isolates. The yellow star marks the group of sweepovirus sequences described in this work (red dots) showing  $\geq 91\%$  nucleotide identity with both sweet potato mosaic virus and SPLCV isolates. Additional details on the sequences and sweepovirus names are included in Tables S1 and S2.

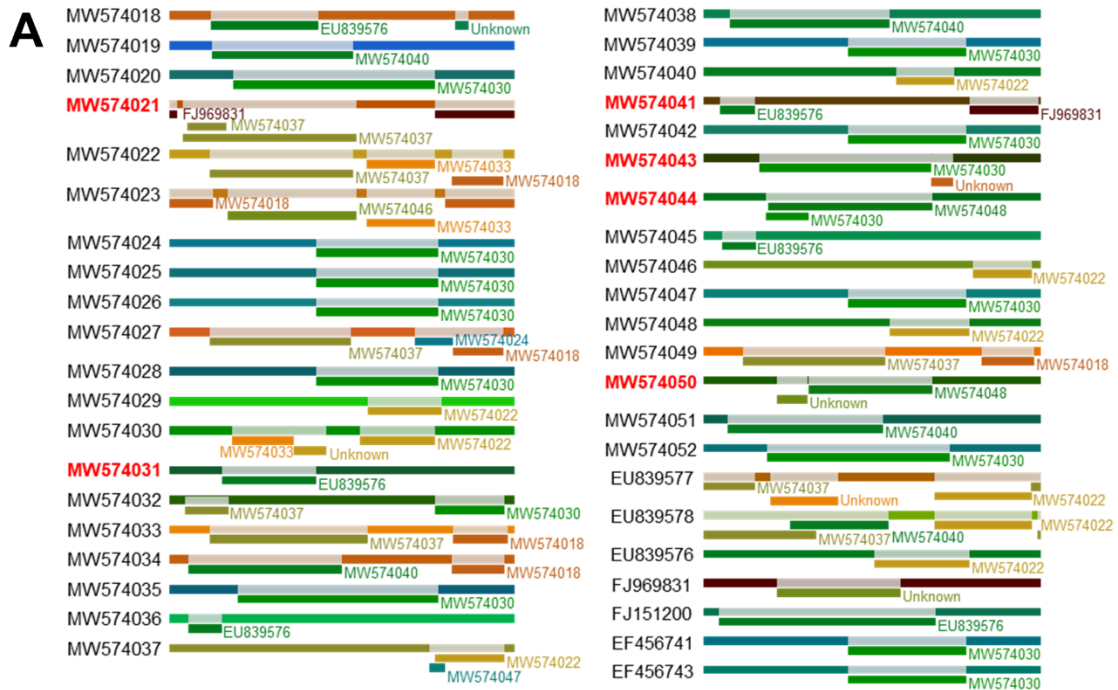

**B**

| Event no. | Found in | Recombinant     | Major parent    | Minor parent | R G B M C S T |
|-----------|----------|-----------------|-----------------|--------------|---------------|
| 1         | 4        | MW574046        | MW574048        | MW574022     | + + + - + +   |
| 2         | 1        | <b>MW574021</b> | MW574032        | FJ969831     | + + + + + +   |
| 3         | 1        | <b>MW574041</b> | MW574032        | FJ969831     | + + + + + +   |
| 4         | 2        | <b>MW574050</b> | FJ969831        | MW574048     | + + + + + +   |
| 5         | 4        | FJ151200        | MW574039        | EU839576     | + + + + + +   |
| 6         | 14       | <b>MW574043</b> | FJ969831        | MW574030     | + + + + + +   |
| 7         | 6        | MW574034        | MW574032        | MW574018     | + + + + + +   |
| 8         | 2        | EU839577        | MW574022        | MW574037     | + + + + + +   |
| 9         | 5        | MW574030        | MW574037        | MW574022     | + + + + + +   |
| 10        | 1        | MW574032        | MW574038        | MW574030     | + + + - + +   |
| 11        | 1        | MW574018        | FJ969831        | EU839576     | + + + + + +   |
| 12        | 1        | <b>MW574031</b> | FJ969831        | EU839576     | + + + + + +   |
| 13        | 5        | MW574038        | FJ969831        | MW574040     | + + + + + +   |
| 14        | 2        | MW574032        | MW574033        | MW574037     | + + + + + +   |
| 15        | 1        | EU839577        | MW574046        | Unknown      | + + + + + +   |
| 16        | 2        | FJ969831        | MW574027        | Unknown      | + + + + + +   |
| 17        | 1        | MW574030        | MW574029        | Unknown      | + + + + - +   |
| 18        | 2        | MW574023        | Unknown         | MW574033     | + + + + + +   |
| 19        | 1        | <b>MW574043</b> | <b>MW574031</b> | Unknown      | + + + + - +   |
| 20        | 1        | MW574023        | MW574027        | MW574046     | + - - + + -   |
| 21        | 1        | MW574030        | MW574029        | MW574033     | + + + + + +   |
| 22        | 1        | MW574037        | MW574046        | MW574047     | - + + + + +   |
| 23        | 5        | MW574027        | MW574018        | MW574037     | + + + + + +   |
| 24        | 1        | MW574027        | MW574018        | MW574024     | + + + + + +   |
| 25        | 1        | MW574018        | <b>MW574031</b> | Unknown      | + + - + + -   |

**Figure S2.** Recombination analysis using RDP4 package [32] of the sweepovirus genomes obtained in this work (MW574018-MW574052), closely related sweet potato leaf curl virus (SPLCV) isolates previously reported from Spain and a sweet potato mosaic virus (SPMV) isolate (FJ969831). **(A)** Schematic diagram showing putative recombinant fragments. **(B)** Overview of the recombination results showing for each recombination event the number of sequences where it was found, the putative recombinant sequence, the major and minor parents, and the methods (R, RDP; G, GENECONV; B, BOOTSCAN; M, MAXIMUM CHI SQUARE; C, CHIMAERA; S, SISTER SCAN and 3S, 3SEQ) that identified (+) it. Details on sweepovirus sequences retrieved from GenBank are given in Table S2. GenBank accessions numbers for sweepovirus isolates occupying an intermediate position between SPLCV and SPMV isolates are highlighted in red.

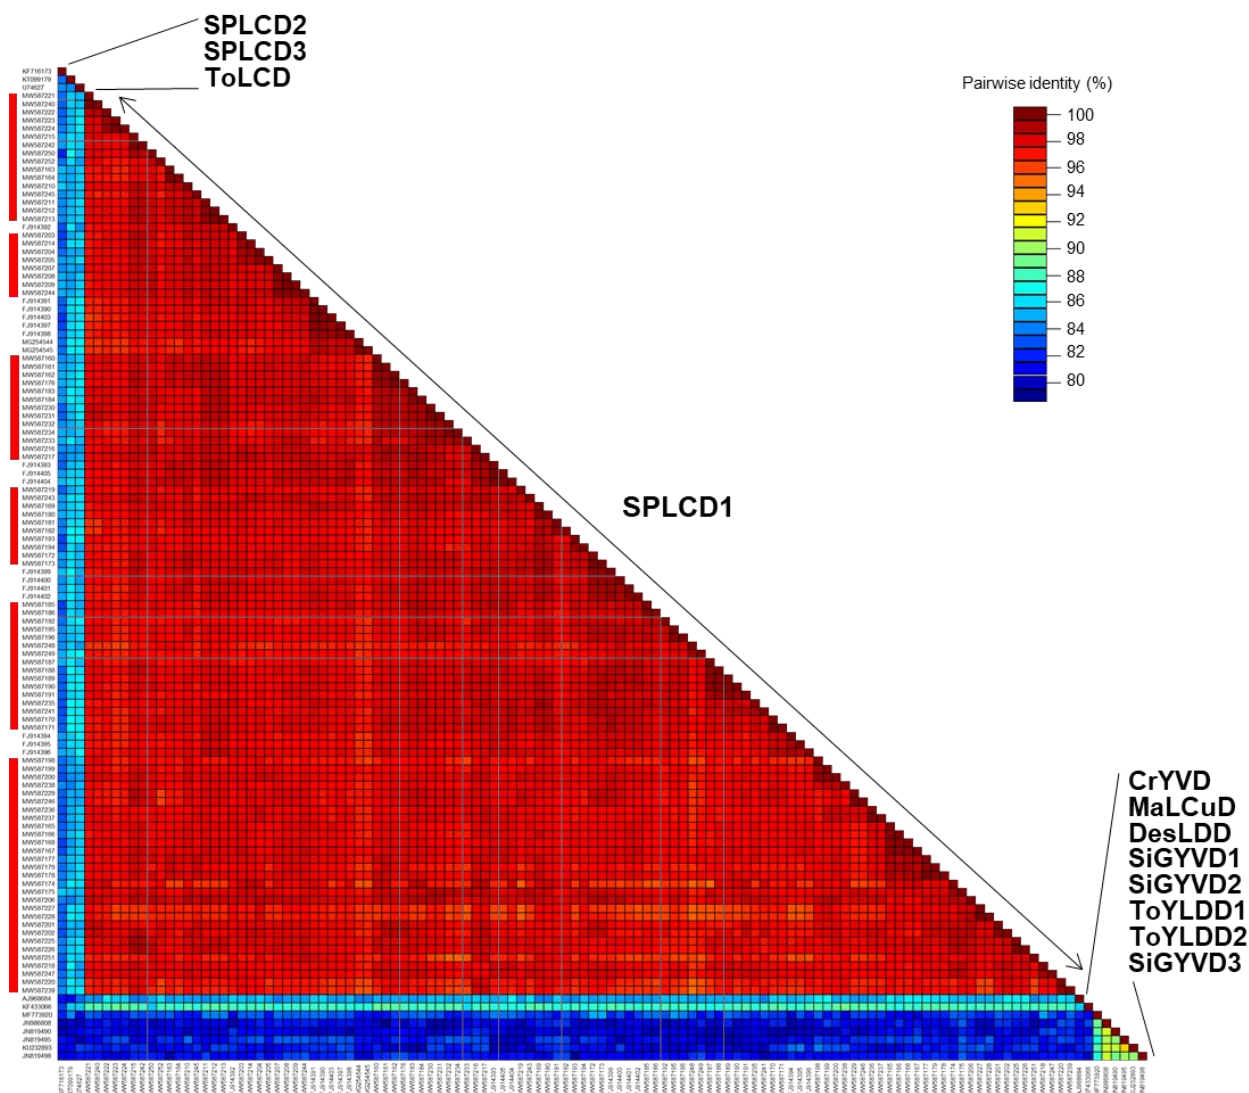

**Figure S3.** Color-coded matrix of pairwise sequence identity scores generated by alignment of the full-length genomes of the deltasetellites obtained in this work (marked with red lines at the left of the graph), sweet potato leaf curl deltasetellite 1 (SPLCD1) isolates previously reported from Spain and Portugal and one representative isolate of all other deltasetellite species. Additional details on the sequences and deltasetellite names are included in Tables S1 and S3.

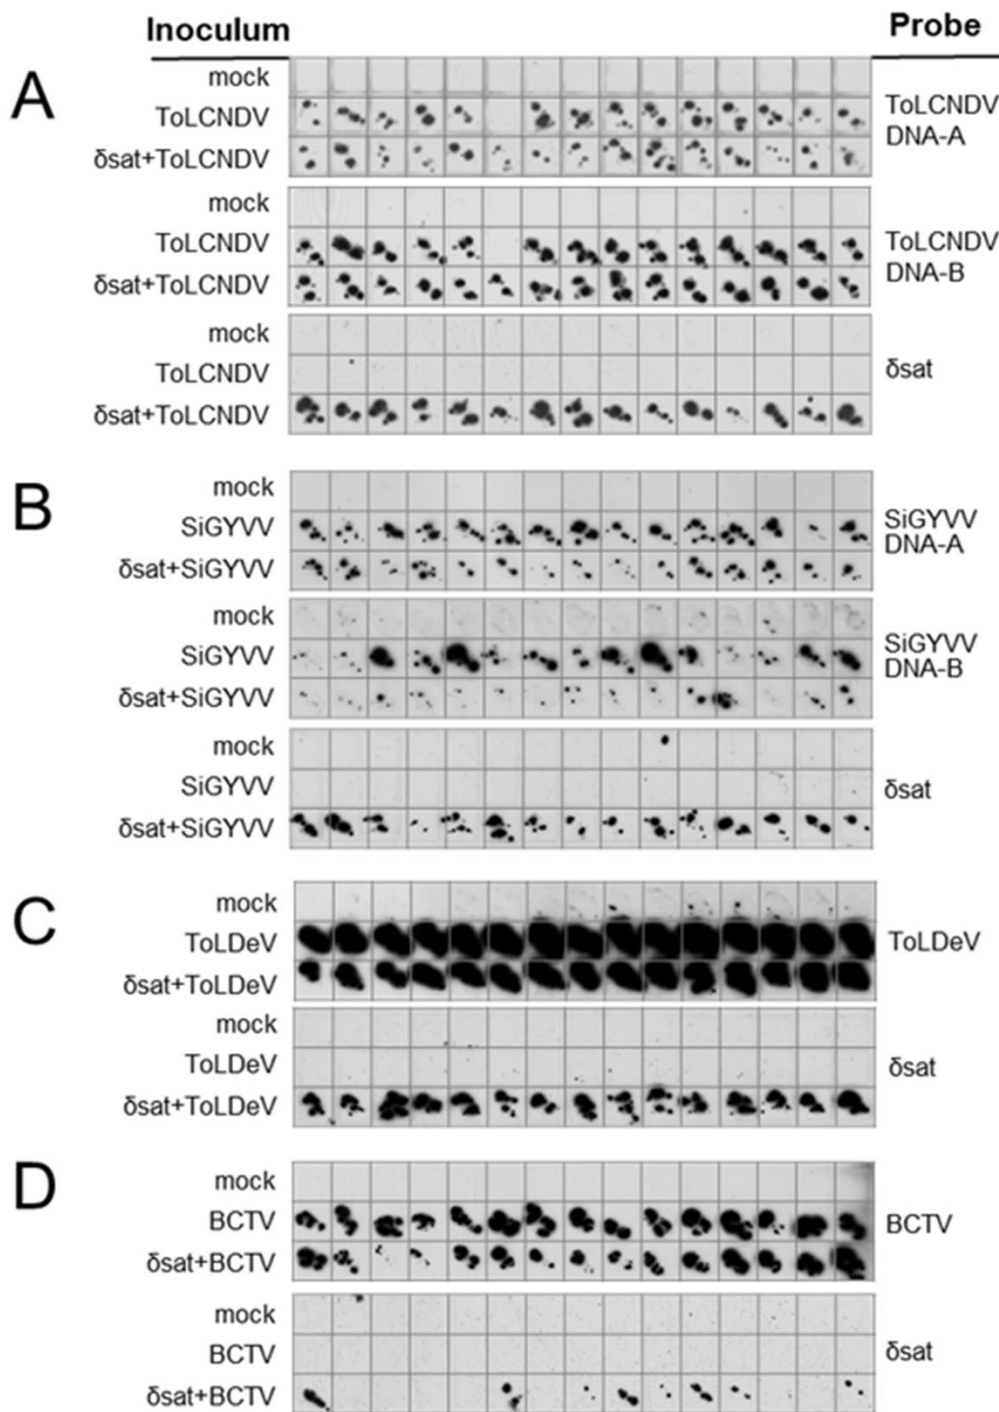

**Figure S4.** DNA hybridization of petiole cross section blots of newly emerged young leaves of *Nicotiana benthamiana* plants agroinoculated with (A) tomato leaf curl New Delhi virus (ToLCNDV), (B) Sida golden yellow vein virus (SiGYVV), (C) tomato leaf deformation virus (ToLDeV) or (D) beet curly top virus (BCTV) alone or in combination with sweet potato leaf curl delta-satellite 1 (δsat). Probes used are indicated at the right of the figure. One of two experiments carried out with each geminivirid-delta-satellite combination (Table 2) is shown.



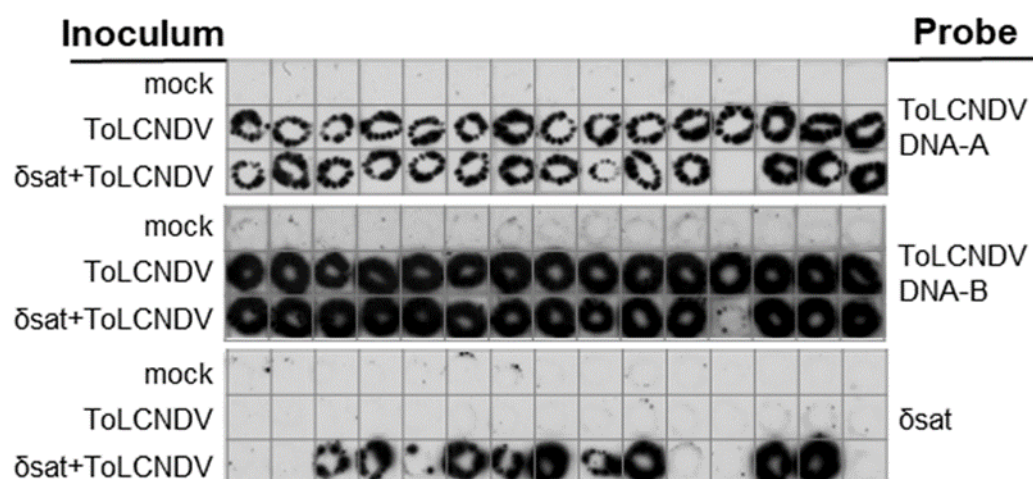

**Figure S5.** DNA hybridization of petiole cross section blots of newly emerged young leaves of zucchini plants agroinoculated with tomato leaf curl New Delhi virus (ToLCNDV) and sweet potato leaf curl deltasatellite 1 (δsat). Probes used are indicated at the right of the figure. Experiment 2 (Table 3) is shown.

**Table S1.** Information of the *Ipomoea indica* samples used in this study.

| Province/<br>island | Sample<br>code | Sampling<br>date | Geographical<br>coordinates | Symptoms | RCA analysis     |                     | Sweepovirus<br>GenBank acc. no. | Deltasatellite<br>GenBank acc. no. |
|---------------------|----------------|------------------|-----------------------------|----------|------------------|---------------------|---------------------------------|------------------------------------|
|                     |                |                  |                             |          | Sweepo-<br>virus | Delta-<br>satellite |                                 |                                    |
| Murcia              | ii59           | Oct-15           | 37°55.582'N 1°07.544'W      | -        | +                | -                   | -                               | -                                  |
|                     | ii60           | Oct-15           | 38°03.130'N 1°13.032'W      | -        | +                | -                   | -                               | -                                  |
|                     | ii61           | Oct-15           | 38°03.130'N 1°13.032'W      | LC       | +                | +                   | MW574052                        | MW587248 MW587249                  |
|                     | ii62           | Oct-15           | 38°03.130'N 1°13.032'W      | YV       | +                | -                   | -                               | -                                  |
|                     | ii63           | Oct-15           | 38°03.130'N 1°13.032'W      | -        | +                | -                   | -                               | -                                  |
| Granada             | ii49           | Aug-15           | 36°44.182'N 3°40.806'W      | -        | +                | +                   | -                               | MW587206                           |
|                     | ii50           | Aug-15           | 36°44.612'N 3°33.341'W      | -        | +                | +                   | MW574051                        | MW587242 MW587215                  |
|                     | ii51           | Aug-15           | 36°43.562'N 3°32.320'W      | -        | +                | +                   | MW574042                        | MW587243                           |
|                     | ii52           | Aug-15           | 36°44.037'N 3°32.930'W      | -        | +                | +                   | -                               | MW587244                           |
|                     | ii53           | Aug-15           | 36°44.041'N 3°32.925'W      | -        | +                | +                   | MW574049                        | MW587207 MW587208 MW587209         |
| Málaga              | ii01           | Feb-15           | 36°45.444'N 4°02.654'W      | -        | +                | -                   | -                               | -                                  |
|                     | ii02           | Feb-15           | 36°45.452'N 4°02.670'W      | -        | +                | -                   | -                               | -                                  |
|                     | ii03           | Feb-15           | 36°45.453'N 4°02.687'W      | -        | +                | +                   | MW574018                        | MW587174 MW587175                  |
|                     | ii04           | Feb-15           | 36°44.794'N 4°03.014'W      | -        | +                | -                   | -                               | -                                  |
|                     | ii05           | Feb-15           | 36°44.800'N 4°03.013'W      | -        | +                | -                   | -                               | -                                  |
|                     | ii06           | Feb-15           | 36°44.053'N 4°06.920'W      | -        | +                | +                   | MW574019                        | MW587160 MW587161                  |
|                     | ii07           | Feb-15           | 36°44.041'N 4°06.927'W      | YV, LC   | +                | +                   | MW574020                        | MW587162 MW587176                  |
|                     | ii08           | Feb-15           | 36°44.084'N 4°06.930'W      | -        | +                | +                   | MW574021                        | MW587163 MW587164                  |
|                     | ii09           | Feb-15           | 36°46.002'N 4°06.455'W      | YV       | +                | +                   | MW574027 MW574028               | MW587165 MW587166                  |
|                     | ii10           | Feb-15           | 36°45.994'N 4°06.460'W      | YV, LC   | +                | +                   | MW574022                        | MW587167 MW587168                  |
|                     | ii11           | Feb-15           | 36°45.990'N 4°06.463'W      | -        | +                | +                   | MW574023                        | MW587177 MW587178 MW587179         |
|                     | ii12           | Feb-15           | 36°47.620'N 4°07.252'W      | YV, LC   | +                | +                   | MW574024                        | MW587169 MW587180                  |
|                     | ii13           | Feb-15           | 36°47.640'N 4°07.254'W      | -        | +                | +                   | MW574025                        | MW587170 MW587171                  |
|                     | ii14           | Feb-15           | 36°47.954'N 4°07.369'W      | -        | +                | +                   | MW574026                        | MW587172 MW587173                  |
|                     | ii15           | Feb-15           | 36°47.952'N 4°07.362'W      | -        | -                | -                   | -                               | -                                  |
|                     | ii16           | Feb-15           | 36°49.881'N 4°07.555'W      | -        | -                | -                   | -                               | -                                  |
|                     | ii17           | Feb-15           | 36°49.896'N 4°07.538'W      | -        | -                | -                   | -                               | -                                  |
|                     | ii18           | May-15           | 36°44.748'N 4°02.216'W      | -        | +                | +                   | -                               | MW587181 MW587182                  |
|                     | ii19           | May-15           | 36°44.629'N 4°02.164'W      | YV       | +                | +                   | -                               | MW587183 MW587184                  |
|                     | ii20           | May-15           | 36°44.631'N 4°01.113'W      | -        | +                | +                   | -                               | MW587185 MW587186                  |
|                     | ii21           | May-15           | 36°43.967'N 3°56.509'W      | LC       | +                | +                   | MW574029                        | MW587187 MW587188                  |
|                     | ii22           | May-15           | 36°43.963'N 3°56.510'W      | LC       | +                | +                   | MW574048                        | MW587189 MW587190 MW587191         |
|                     | ii23           | May-15           | 36°44.162'N 3°55.942'W      | -        | +                | +                   | MW574030                        | MW587192 MW587193 MW587194         |
|                     | ii24           | May-15           | 36°44.189'N 3°55.878'W      | -        | -                | -                   | -                               | -                                  |
|                     | ii25           | May-15           | 36°44.191'N 3°55.870'W      | -        | +                | +                   | MW574033                        | MW587195 MW587196                  |
|                     | ii26           | May-15           | 36°44.668'N 3°52.526'W      | -        | +                | +                   | MW574045                        | MW587238                           |
|                     | ii27           | May-15           | 36°44.660'N 3°52.539'W      | -        | +                | +                   | MW574031                        | MW587198 MW587199 MW587200         |
|                     | ii28           | May-15           | 36°44.710'N 3°52.531'W      | -        | +                | +                   | MW574034                        | MW587201 MW587202                  |
|                     | ii29           | May-15           | 36°44.883'N 3°52.261'W      | -        | -                | -                   | -                               | -                                  |
|                     | ii30           | May-15           | 36°44.877'N 3°52.248'W      | -        | +                | +                   | MW574032                        | MW587216 MW587217                  |
|                     | ii31           | May-15           | 36°44.880'N 3°52.259'W      | -        | +                | +                   | MW574035                        | MW587247 MW587218                  |
|                     | ii32           | May-15           | 36°45.466'N 3°51.732'W      | -        | +                | +                   | -                               | MW587219                           |
|                     | ii33           | May-15           | 36°45.468'N 3°51.750'W      | -        | +                | +                   | -                               | MW587220 MW587239                  |
|                     | ii34           | May-15           | 36°45.291'N 3°51.200'W      | -        | +                | +                   | MW574036                        | MW587221 MW587240                  |
|                     | ii35           | May-15           | 36°45.294'N 3°51.115'W      | -        | +                | +                   | MW574046                        | MW587222 MW587223 MW587224         |
|                     | ii36           | May-15           | 36°44.448'N 3°45.639'W      | -        | +                | +                   | -                               | MW587225 MW587226                  |
|                     | ii37           | May-15           | 36°44.279'N 3°45.639'W      | -        | +                | -                   | -                               | -                                  |
|                     | ii38           | May-15           | 36°44.374'N 3°41.753'W      | -        | +                | +                   | MW574037                        | MW587227 MW587228                  |
|                     | ii39           | May-15           | 36°44.367'N 3°41.736'W      | -        | +                | +                   | -                               | MW587229 MW587246                  |
|                     | ii40           | May-15           | 36°44.775'N 3°36.233'W      | -        | +                | +                   | MW574038                        | MW587230 MW587231                  |
|                     | ii41           | May-15           | 36°44.807'N 3°36.210'W      | -        | +                | +                   | -                               | MW587232 MW587233 MW587234         |
|                     | ii42           | May-15           | 36°42.543'N 3°29.545'W      | -        | +                | +                   | MW574039                        | MW587235 MW587241                  |
|                     | ii43           | May-15           | 36°42.486'N 3°29.541'W      | -        | +                | +                   | MW574040                        | MW587236 MW587237                  |
|                     | ii44           | May-15           | 36°49.914'N 3°31.106'W      | -        | +                | -                   | -                               | -                                  |
|                     | ii45           | Aug-15           | 36°45.728'N 3°53.302'W      | -        | +                | +                   | -                               | MW587245                           |
|                     | ii46           | Aug-15           | 36°45.692'N 3°53.302'W      | -        | -                | -                   | -                               | -                                  |
|                     | ii47           | Aug-15           | 36°45.839'N 3°53.291'W      | -        | +                | +                   | MW574041                        | MW587203 MW587214                  |
|                     | ii48           | Aug-15           | 36°45.858'N 3°53.307'W      | -        | +                | +                   | -                               | MW587204 MW587205                  |
|                     | ii54           | Sep-15           | 36°27.268'N 5°4.862'W       | -        | +                | -                   | -                               | -                                  |
|                     | ii55           | Sep-15           | 36°27.254'N 5°4.850'W       | -        | +                | -                   | -                               | -                                  |
|                     | ii64           | Oct-15           | 36°44.686'N 4°5.275'W       | -        | +                | +                   | MW574047                        | MW587250                           |
|                     | ii65           | Oct-15           | 36°44.686'N 4°5.275'W       | -        | +                | +                   | -                               | MW587251 MW587252                  |
| Cádiz               | ii56           | Sep-15           | 36°4.824'N 5°30.168'W       | -        | +                | -                   | MW574043                        | -                                  |
|                     | ii57           | Sep-15           | 36°4.803'N 5°30.106'W       | -        | +                | +                   | MW574050                        | MW587210 MW587211                  |
|                     | ii58           | Sep-15           | 36°4.824'N 5°30.096'W       | -        | +                | +                   | MW574044                        | MW587212 MW587213                  |
| Tenerife            | ii66           | Feb-15           | 28°30.814'N 16°23.159'W     | -        | -                | -                   | -                               | -                                  |
|                     | ii67           | Feb-15           | 28°30.824'N 16°23.154'W     | -        | -                | -                   | -                               | -                                  |
|                     | ii68           | Feb-15           | 28°34.066'N 16°19.707'W     | -        | -                | -                   | -                               | -                                  |

|              |      |        |                         |        |   |   |   |   |
|--------------|------|--------|-------------------------|--------|---|---|---|---|
|              | ii69 | Feb-15 | 28°32.093'N 16°23.677'W | -      | - | - | - | - |
|              | ii70 | Feb-15 | 28°34.372'N 16°11.228'W | -      | - | - | - | - |
|              | ii71 | Feb-15 | 28°34.413'N 16°11.285'W | -      | - | - | - | - |
|              | ii72 | Feb-15 | 28°28.555'N 16°19.996'W | YV, LC | - | - | - | - |
|              | ii73 | Feb-15 | 28°28.555'N 16°19.973'W | YV, LC | - | - | - | - |
|              | ii74 | Feb-15 | 28°28.555'N 16°19.965'W | YV, LC | - | - | - | - |
|              | ii75 | Feb-15 | 28°28.568'N 16°24.746'W | -      | - | - | - | - |
|              | ii76 | Feb-15 | 28°28.574'N 16°24.769'W | -      | - | - | - | - |
|              | ii77 | Feb-15 | 28°22.818'N 16°41.515'W | -      | - | - | - | - |
| Gran Canaria | ii78 | Feb-15 | 28°00.257'N 15°24.288'W | -      | - | - | - | - |
|              | ii79 | Feb-15 | 28°02.584'N 15°28.636'W | YV     | - | - | - | - |
|              | ii80 | Feb-15 | 28°02.606'N 15°28.631'W | YV, LC | - | - | - | - |
|              | ii81 | Feb-15 | 28°06.843'N 15°29.758'W | -      | - | - | - | - |
|              | ii82 | Feb-15 | 28°01.535'N 15°30.281'W | YV, LC | - | - | - | - |
|              | ii83 | Feb-15 | 28°01.541'N 15°30.276'W | YV, LC | - | - | - | - |
|              | ii84 | Feb-15 | 28°01.335'N 15°30.663'W | -      | - | - | - | - |
|              | ii85 | Feb-15 | 28°03.484'N 15°34.002'W | YV, LC | - | - | - | - |
|              | ii86 | Feb-15 | 28°03.785'N 15°33.182'W | YV, LC | - | - | - | - |
|              | ii87 | Feb-15 | 28°05.608'N 15°29.993'W | YV, LC | - | - | - | - |
|              | ii88 | Feb-15 | 28°05.599'N 15°30.004'W | YV, LC | - | - | - | - |
|              | ii89 | Feb-15 | 27°54.447'N 15°30.588'W | -      | - | - | - | - |

+, presence of sweepoviruses or deltasatellites; -, absence of symptoms, sweepoviruses, deltasatellites or nucleotide sequences; YV, yellow veins; LC, leaf curling.



**Table S2.** Sweepovirus sequences retrived from GenBank used for pairwise sequence identity, phylogenetic and recombination analyses.

| Acronym   | Plant host            | Location (country)   | Genbank acc. no. |
|-----------|-----------------------|----------------------|------------------|
| SPLCCNV   | Sweet potato          | Liaoning (CN)        | DQ512731         |
| SPLCCV    | Sweet potato          | Canary Islands (ES)  | EF456745         |
| SPLCGV    | Sweet potato          | Georgia (US)         | AF326775         |
| SPLCHnV   | Sweet potato          | Henan (CN)           | KC907406         |
| SPLCSCV   | Sweet potato          | South Carolina (US)  | HQ333144         |
| SPLCSiV-1 | Sweet potato          | Sichuan (CN)         | KC488316         |
| SPLCSiV-2 | Sweet potato          | Sichuan (CN)         | KF156759         |
| SPLCSPV   | Sweet potato          | São Paulo (BR)       | HQ393477         |
| SPLCUV    | Sweet potato          | Kampala (UG)         | FR751068         |
| SPLCV     | Sweet potato          | Canary Islands (ES)  | EF456741         |
|           | Sweet potato          | Carnary Islands (ES) | EF456743         |
|           | <i>Ipomoea indica</i> | Málaga (ES)          | FJ151200         |
|           | <i>Ipomoea indica</i> | Málaga (ES)          | EU839576         |
|           | <i>Ipomoea indica</i> | Málaga (ES)          | EU839577         |
| SPMV      | <i>Ipomoea indica</i> | Málaga (ES)          | EU839578         |
|           | Sweet potato          | Brasilia (BR)        | FJ969831         |

SPLCCNV, sweet potato leaf curl China virus; SPLCCV, sweet potato leaf curl Canary virus; SPLCHnV, sweet potato leaf curl Henan virus; SPLCSiV-1, sweet potato leaf curl Sichuan virus 1; SPLCSiV-2, sweet potato leaf curl Sichuan virus 2; SPLCSPV, sweet potato leaf curl Sao Paulo virus; SPLCUV, sweet potato leaf curl Uganda virus; SPLCV, sweet potato leaf curl vírus; SPMV, sweet potato mosaic virus.

**Table S3.** Deltasatellite sequences retrieved from GenBank used for pairwise sequence identity, phylogenetic and recombination analyses.

| Deltasatellite | Isolate         | Host                              | Location (country)      | GenBank acc. no. |
|----------------|-----------------|-----------------------------------|-------------------------|------------------|
| CrYVD          | IN-09           | <i>Croton bonplandianus</i>       | Madurai (IN)            | AJ968684         |
| DesLDD         | CU-Co704-H1-13  | <i>Corchorus siliquosus</i>       | Matanzas (CU)           | MF773920         |
| MaLCuD         | PH-12           | <i>Malvastrum coromandelianum</i> | Philippines             | KF433066         |
| SiGYVD1        | CU-177H1-09     | <i>Malvastrum coromandelianum</i> | Camaguey (CU)           | JN986808         |
| SiGYVD2        | CU-228H1-09     | <i>Malvastrum coromandelianum</i> | Holguin (CU)            | JN819490         |
| SiGYVD3        | CU-412N1-10     | <i>Malvastrum coromandelianum</i> | Matanzas (CU)           | JN819498         |
| SPLCD1         | ES-SBG32-02     | Sweet potato                      | Canary Islands (ES)     | FJ914391         |
|                | ES-SBG51-02     | Sweet potato                      | Canary Islands (ES)     | FJ914390         |
|                | ES-SBG57-02     | Sweet potato                      | Canary Islands (ES)     | FJ914397         |
|                | ES-SBG58-02     | Sweet potato                      | Canary Islands (ES)     | FJ914398         |
|                | ES-SBG59-02     | Sweet potato                      | Canary Islands (ES)     | FJ914403         |
|                | ES-SBG52-02     | Sweet potato                      | Málaga (ES)             | FJ914392         |
|                | ES-SBG54-02     | Sweet potato                      | Málaga (ES)             | FJ914394         |
|                | ES-SBG53-02     | Sweet potato                      | Málaga (ES)             | FJ914393         |
|                | ES-SBG55-02     | Sweet potato                      | Málaga (ES)             | FJ914395         |
|                | ES-SBG56-02     | Sweet potato                      | Málaga (ES)             | FJ914396         |
|                | ES-SBG3-5-02    | Sweet potato                      | Málaga (ES)             | FJ914404         |
|                | ES-SBGB3-6-02   | Sweet potato                      | Málaga (ES)             | FJ914405         |
|                | ES-SI3C-3-06    | <i>Ipomoea indica</i>             | Málaga (ES)             | FJ914399         |
|                | ES-SI3C-5-06    | <i>Ipomoea indica</i>             | Málaga (ES)             | FJ914400         |
|                | ES-SI3D-11-06   | <i>Ipomoea indica</i>             | Málaga (ES)             | FJ914401         |
|                | ES-SI3D-12-06   | <i>Ipomoea indica</i>             | Málaga (ES)             | FJ914402         |
|                | PT-FarP2I3-1-17 | <i>Ipomoea indica</i>             | Faro (PT)               | MG254544         |
|                | PT-FarP2I3-2-17 | <i>Ipomoea indica</i>             | Faro (PT)               | MG254545         |
| SPLCD2         | VE-1764E13-09   | <i>Merremia dissecta</i>          | Sucre (VE)              | KF716173         |
| SPLCD3         | PR-T1_1-10      | <i>Bemisia tabaci</i> /tomato     | Santa Isabel (PR)       | KT099179         |
| ToLCD          | AU-96           | Tomato                            | Northern Territory (AU) | U74627           |
| ToYLLDD1       | CU-404N1-10     | <i>Sidastrum micranthum</i>       | Matanzas (CU)           | JN819495         |
| ToYLLDD2       | CU-603N1-11     | <i>Sidastrum micranthum</i>       | Matanzas (CU)           | KU232893         |

CrYVD, Croton yellow vein deltaxatellite; DesLDD, Desmodium leaf distortion deltaxatellite; MaLCuV, Malvastrum leaf curl deltaxatellite; SiGYVD1, Sida golden yellow vein deltaxatellite 1; SiGYVD2, Sida golden yellow vein deltaxatellite 2; SiGYVD3, Sida golden yellow vein deltaxatellite 3; SPLCD1, sweet potato leaf curl deltaxatellite 1; SPLCD2, sweet potato leaf curl deltaxatellite 2; SPLCD3, sweet potato leaf curl deltaxatellite 3; ToLCD, tomato leaf curl deltaxatellite; ToYLLDD1, tomato yellow leaf distortion deltaxatellite 1; ToYLLDD2, tomato yellow leaf distortion deltaxatellite 2.

**Table S4.** List of primers used for real-time PCR to amplify the deltasatellite and viral DNA or plant reference genes.

| Deltasatellite/virus/plant reference genes | Primer code | Primer sequence (5'-3') | Reference |
|--------------------------------------------|-------------|-------------------------|-----------|
| SPLCD1                                     | MA2713      | GCTGATAAAGCTGTCGGA ACTA | This work |
|                                            | MA2714      | GTAGCGGTTTGGGCATTTAAC   |           |
| SPLCV                                      | MA2711      | ACTTTCCTCTTGGCCTTCTTC   | This work |
|                                            | MA2712      | GGCAACAGCAAACGCTATATTC  |           |
| ToLCNDV DNA-A                              | MA2809      | GATAAAGACGCCACTCTCTTCTC | This work |
|                                            | MA2810      | GTGCGGTTGTTCC TACTACAT  |           |
| ToLCNDV DNA-B                              | MA2811      | CTTGTGGAAGTCACGGAAGT    | This work |
|                                            | MA2812      | GCGTGTATTGTTTGGAGATTGG  |           |
| SiGYVV DNA-A                               | MA2727      | TCTGATGTCAC TCGTGGTAATG | This work |
|                                            | MA2728      | GTTCGTGTGGTTCTTCAGTTTG  |           |
| SiGYVV DNA-B                               | MA2729      | GACCTGTTGCCTGTACTCTATG  | This work |
|                                            | MA2730      | TCAGCTCTGCCATGACTTAAC   |           |
| ToLDeV                                     | MA2725      | GATAGAGGGAGGAGTTGAGGAA  | This work |
|                                            | MA2726      | CAGGAGAGGGACAGAGCTATAA  |           |
| BCTV                                       | MA2751      | CCAGTTATCGTCAGCTCTATCC  | This work |
|                                            | MA2752      | GAGATACGGGCCAATCTATCAA  |           |
| PP2A ( <i>N. benthamiana</i> )             | MA2707      | GACCCTGATGTTGATGTTTCGCT | [38]      |
|                                            | MA2708      | GAGGGATTTGAAGAGAGATTTC  |           |
| EF-1 $\alpha$ (zucchini)                   | MA2824      | GCTTGGGTGCTCGACAAACT    | [39]      |
|                                            | MA2825      | TCCACAGAGCAATGTCAATGG   |           |

SPLCD1, sweet potato leaf curl deltasatellite 1; SPLCV, sweet potato leaf curl virus; ToLCNDV, tomato leaf curl New Delhi virus; SiGYVV, Sida golden yellow vein virus; ToLDeV, tomato leaf deformation virus; BCTV, beet curly top virus; PP2A, protein phosphatase 2A; EF-1 $\alpha$ , elongation factor-1 $\alpha$ .

**Table S5.** Estimate of the coefficient of evolutionary differentiation (d) for the sweet potato leaf curl virus (SPLCV) and sweet potato leaf curl deltasatellite 1 (SPLCD1) genomes obtained in this work and isolates previously reported from Spain. Standard error estimates (S.E.) were obtained by a bootstrap procedure (500 replicates). Analyses were conducted using the maximum composite likelihood model with the MEGA 7 program [31].

| Populations              | SPLCV |       | SPLCD1 |       |
|--------------------------|-------|-------|--------|-------|
|                          | d     | S.E.  | d      | S.E.  |
| Murcia – Granada         | –     | –     | 0.437  | 0.036 |
| Murcia – Málaga          | –     | –     | 0.404  | 0.027 |
| Murcia – Cádiz           | –     | –     | 0.569  | 0.069 |
| Murcia – Canary Islands  | –     | –     | 0.551  | 0.048 |
| Granada – Málaga         | 0.141 | 0.015 | 0.145  | 0.026 |
| Granada - Cádiz          | 0.420 | 0.023 | 0.312  | 0.023 |
| Granada – Canary Islands | 0.196 | 0.019 | 0.254  | 0.041 |
| Málaga – Cádiz           | 0.339 | 0.016 | 0.392  | 0.020 |
| Málaga – Canary Islands  | 0.424 | 0.013 | 0.288  | 0.028 |
| Cádiz – Canary Islands   | 0.685 | 0.025 | 0.471  | 0.043 |
| All populations          | 0.453 | 0.011 | 0.486  | 0.021 |

–, not calculable due to availability of only one sequence from Murcia population.

**Table S6.** Data of virus quantification by real-time PCR ( $2^{-\Delta\Delta C_t}$ ) used to generate Figure 7 with Graphpad Prism 6.0 software. Outlier values identified by the ROUT method are highlighted in black.

| ToLCNDV_Nb_<br>Exp1_DNA-A_-<br>Δsat  | ToLCNDV_Nb_<br>Exp1_DNA-B_-<br>Δsat  | ToLCNDV_Nb_<br>Exp2_DNA-A_-<br>Δsat  | ToLCNDV_Nb_<br>Exp2_DNA-B_-<br>Δsat  | ToLCNDV_Nb_<br>Exp1_DNA-<br>A_+Δsat  | ToLCNDV_Nb_<br>Exp1_DNA-<br>B_+Δsat  | ToLCNDV_Nb_<br>Exp2_DNA-<br>A_+Δsat  | ToLCNDV_Nb_<br>Exp2_DNA-<br>B_+Δsat  |
|--------------------------------------|--------------------------------------|--------------------------------------|--------------------------------------|--------------------------------------|--------------------------------------|--------------------------------------|--------------------------------------|
| 55,878.2803                          | 1,732.9328                           | 14,899.7448                          | 1,491.9671                           | 70,630.3194                          | 3,099.8872                           | 6,742.1827                           | 609.7187                             |
| 34,041.3351                          | 942.2722                             | 16,024.5919                          | 1,024.7100                           | 61,402.0839                          | 1,584.7066                           | 17,743.4631                          | 1,079.3896                           |
| 48,442.9801                          | 2,567.2356                           | 8,135.4137                           | 883.4471                             | 113,238.1061                         | 4,045.2131                           | 77,720.0926                          | 7,326.9650                           |
| 24,339.2991                          | 781.4447                             | 9,541.4975                           | 707.2125                             | 46,180.6225                          | 1,628.1298                           | 14,745.6316                          | 1,396.8874                           |
| 25,197.6226                          | 483.0404                             | 45,418.7380                          | 927.3692                             | 70,045.2694                          | 2,253.5754                           | 97,830.7241                          | 3,856.2958                           |
| 88,906.4212                          | <b>6,480.9968</b>                    | 30,936.0204                          | 1,622.4969                           | 95,684.6579                          | 12,704.0423                          | 62,000.8339                          | 2,460.9506                           |
| 32,541.6549                          | 1,391.0900                           | 101,985.1803                         | 4,585.9344                           | 183,065.4486                         | 10,311.7388                          | 140,967.2007                         | 6,281.9642                           |
| 57,929.0747                          | 3,514.2473                           | 24,542.5919                          | 422.2636                             | 113,002.8787                         | 7,141.4435                           | 119,694.7210                         | 5,556.6513                           |
| 30,278.3717                          | 1,032.5529                           | 40,454.1475                          | 1,288.0742                           | 97,695.1959                          | 4,793.9528                           | 110,523.9881                         | 5,412.2021                           |
| 31,695.7108                          | 1,216.0611                           | 70,385.9571                          | 3,350.1268                           | 30,978.9366                          | 1,158.4660                           | 73,476.7401                          | 3,125.7789                           |
| 52,244.8061                          | 2,948.9793                           | 32,339.2814                          | 843.9420                             | 166,365.8736                         | 12,442.5969                          | 125,645.5456                         | 7,945.9280                           |
| 23,526.5149                          | 1,063.7917                           | 39,266.1900                          | 1,865.0518                           | 236,421.2192                         | 21,769.1884                          | 132,075.1937                         | 7,231.1029                           |
| 96,216.7201                          | <b>7,744.7341</b>                    | <b>179,173.7793</b>                  | 5,828.8679                           | 268,209.3489                         | 24,971.5889                          | 79,023.8218                          | 2,795.7119                           |
| 39,157.4718                          | 2,367.2560                           | 132,901.6969                         | 4,426.6512                           | 179,671.2438                         | 6,912.5390                           | 104,489.6123                         | 3,251.7486                           |
|                                      |                                      | 49,667.0005                          | 2,724.9235                           | 151,294.4982                         | 8,433.9924                           | 141,751.0602                         | 7,945.9280                           |
| ToLCNDV_zuc_<br>Exp1_DNA-A_-<br>Δsat | ToLCNDV_zuc_<br>Exp1_DNA-B_-<br>Δsat | ToLCNDV_zuc_<br>Exp2_DNA-A_-<br>Δsat | ToLCNDV_zuc_<br>Exp2_DNA-B_-<br>Δsat | ToLCNDV_zuc_<br>Exp1_DNA-<br>A_+Δsat | ToLCNDV_zuc_<br>Exp1_DNA-<br>B_+Δsat | ToLCNDV_zuc_<br>Exp2_DNA-<br>A_+Δsat | ToLCNDV_zuc_<br>Exp2_DNA-<br>B_+Δsat |
| 11,730.6879                          | 3,797.9363                           | 23,987.5800                          | 13,261.9013                          | 8,192.0000                           | 3,198.1015                           | 16,013.4884                          | 6,562.3644                           |
| <b>59,064.3503</b>                   | <b>43,538.3768</b>                   | 20,199.0525                          | 9,089.5931                           | 7,383.0438                           | 4,399.1223                           | 27,193.9858                          | 13,484.3653                          |
| 8,773.8845                           | 2,208.7279                           | 12,899.2539                          | 6,268.9148                           | 9,108.5141                           | 4,064.8883                           | 27,250.5929                          | 11,028.8902                          |
| 7,766.2369                           | 2,111.4231                           | 13,663.1262                          | 4,757.5398                           | 3,396.8929                           | 1,128.3508                           | 25,673.6358                          | 24,833.5002                          |
| 3,769.0886                           | 491.8246                             | 17,718.8825                          | 6,994.4747                           | 2,828.8501                           | 1,195.1699                           | 13,873.0752                          | 7,825.6778                           |
| <b>36,814.8448</b>                   | <b>32,227.3960</b>                   | 24,696.1752                          | 31,021.9123                          |                                      |                                      | 18,331.0271                          | 9,802.9483                           |
| 7,956.9510                           | 1,775.4881                           | 17,499.1836                          | 19,714.9168                          |                                      |                                      | 38,325.0486                          | 12,607.5471                          |
| 2,554.8095                           | 1,012.0045                           | 14,282.8870                          | 21,071.4212                          |                                      |                                      | 24,936.9949                          | 8,317.8791                           |
| <b>22,978.5477</b>                   | <b>17,008.8738</b>                   | 23,526.5149                          | 30,679.7690                          |                                      |                                      | 45,734.6503                          | 16,612.7121                          |
| 8,516.2347                           | 3,036.0924                           | 20,867.9318                          | 22,149.7071                          |                                      |                                      |                                      |                                      |
| 10,506.5398                          | 4,783.9944                           | 23,445.1193                          | 4,252.2185                           |                                      |                                      |                                      |                                      |
| 8,983.1145                           | 2,844.5801                           | 29,799.4896                          | 12,677.6524                          |                                      |                                      |                                      |                                      |
| 4,887.9032                           | 1,805.2714                           | 26,395.4200                          | 10,148.6485                          |                                      |                                      |                                      |                                      |
| 6,626.3560                           | 2,866.3519                           | 28,172.5005                          | 11,175.0991                          |                                      |                                      |                                      |                                      |
| 5,326.6028                           | 2,286.6185                           | 23,090.3113                          | 11,331.0976                          |                                      |                                      |                                      |                                      |
| SiGYVV_Nb_Ex<br>p1_DNA-A_-Δsat       | SiGYVV_Nb_Ex<br>p1_DNA-B_-Δsat       | SiGYVV_Nb_Ex<br>p2_DNA-A_-Δsat       | SiGYVV_Nb_Ex<br>p2_DNA-B_-Δsat       | SiGYVV_Nb_Ex<br>p1_DNA-<br>A_+Δsat   | SiGYVV_Nb_Ex<br>p1_DNA-<br>B_+Δsat   | SiGYVV_Nb_Ex<br>p2_DNA-<br>A_+Δsat   | SiGYVV_Nb_Ex<br>p2_DNA-<br>B_+Δsat   |
| 503.9022                             | 37.3750                              | 522.0340                             | 67.6492                              | 205.3584                             | 31.5594                              | 68.9271                              | 8.0556                               |
| 506.0023                             | 133.1584                             | 306.7671                             | 47.3076                              | 147.7485                             | 42.6065                              | 216.3165                             | 28.4430                              |
| 429.9425                             | 29.0809                              | 531.1590                             | 17.1246                              | 152.8529                             | 30.6327                              | 111.1219                             | 15.9115                              |
| 834.6341                             | 260.2943                             | 701.8408                             | 27.1711                              | 132.7898                             | 19.3868                              | 113.8508                             | 17.2677                              |
| 926.7266                             | 150.2270                             | 543.8255                             | 30.7817                              | 84.2731                              | 13.0864                              | 154.2365                             | 67.5086                              |
| 713.1195                             | 195.3612                             | 595.1048                             | 75.5835                              | 43.1115                              | 10.6295                              | 129.2482                             | 34.1071                              |
| 627.7298                             | 180.7686                             | 562.6134                             | 173.6454                             | 141.8281                             | 38.0810                              | 98.8384                              | 30.1273                              |
| 870.6807                             | 264.2940                             | 406.1869                             | 102.0406                             | 125.0187                             | 44.2008                              | 192.4047                             | 23.1510                              |
| 1,181.1693                           | 371.9591                             | 496.9648                             | 81.2333                              | 261.9232                             | <b>109.0616</b>                      | 266.8712                             | 75.5312                              |
| 580.4387                             | 109.2887                             | 471.7897                             | 79.3413                              | 86.1632                              | 13.2507                              | 115.5201                             | 11.6641                              |
| 250.2108                             | 57.2816                              | 301.0794                             | 33.6142                              | <b>469.5061</b>                      | 37.1941                              | 122.2762                             | 19.6438                              |
| 515.2040                             | 87.6086                              | 559.1145                             | 86.1632                              | 128.0000                             | 27.2088                              | 97.0059                              | 30.5903                              |
| 891.4438                             | 96.8044                              | 774.4348                             | 50.5626                              | <b>417.8960</b>                      | <b>159.2335</b>                      | 105.4197                             | 44.8800                              |
| 874.9156                             | 242.6949                             | 724.0773                             | 19.6847                              | 143.3104                             | 61.9486                              | 106.6692                             | 11.6318                              |
| 1,328.8845                           | 130.9616                             | 585.2868                             | 63.9113                              | 195.4966                             | 26.1910                              | 34.4158                              | 2.7876                               |
| ToLDeV_Nb_Ex<br>p1_-Δsat             | ToLDeV_Nb_Ex<br>p2_-Δsat             | ToLDeV_Nb_Ex<br>p1_+Δsat             | ToLDeV_Nb_Ex<br>p2_+Δsat             |                                      |                                      |                                      |                                      |
| 4,311.5772                           | 5,315.5380                           | 429.3469                             | 1,079.3896                           |                                      |                                      |                                      |                                      |
| 4,630.6532                           | 7,918.4371                           | 1,780.4177                           | 1,684.3777                           |                                      |                                      |                                      |                                      |
| 3,620.5672                           | 8,792.1483                           | 1,054.2490                           | 1,893.7104                           |                                      |                                      |                                      |                                      |
| 5,134.4713                           | 5,812.7293                           | 1,144.1020                           | 2,219.4708                           |                                      |                                      |                                      |                                      |
| 5,028.8054                           | 9,694.8308                           | 3,310.8823                           | 3,263.0378                           |                                      |                                      |                                      |                                      |
| 4,617.8321                           | 4,844.0566                           | 1,718.5785                           | 1,177.0827                           |                                      |                                      |                                      |                                      |
| 5,685.2182                           | 9,351.6162                           | 3,254.0033                           | 2,633.9276                           |                                      |                                      |                                      |                                      |
| 8,112.8888                           | 5,720.7953                           | 1,897.6524                           | 1,918.8151                           |                                      |                                      |                                      |                                      |
| 10,155.6855                          | 6,700.2537                           | 2,734.3837                           | 1,936.1835                           |                                      |                                      |                                      |                                      |
| 6,221.2984                           | 4,124.4899                           | 2,136.4502                           | 1,893.7104                           |                                      |                                      |                                      |                                      |
| 5,673.4084                           | 7,527.7343                           | 2,872.3185                           | 1,528.6051                           |                                      |                                      |                                      |                                      |
| 5,988.5873                           | 6,463.0525                           | 1,225.3685                           | 2,019.8046                           |                                      |                                      |                                      |                                      |
| 6,378.4935                           | 4,405.2250                           | 2,239.5606                           | 838.6936                             |                                      |                                      |                                      |                                      |
| 8,451.5486                           | 7,296.5562                           | 4,332.5479                           | 1,713.8201                           |                                      |                                      |                                      |                                      |
| 5,138.0314                           | 5,415.9549                           | 2,813.2070                           | 1,036.8561                           |                                      |                                      |                                      |                                      |

| BCTV_Nb_Exp1<br>_δsat | BCTV_Nb_Exp2<br>_δsat | BCTV_Nb_Exp1<br>_+δsat | BCTV_Nb_Exp2<br>_+δsat |  |  |  |  |
|-----------------------|-----------------------|------------------------|------------------------|--|--|--|--|
| 5,804.6767            | 3,010.9437            | 9,708.2800             | 718.5775               |  |  |  |  |
| 7,885.5737            | 1,985.1055            | 15,403.8141            | 3,808.4810             |  |  |  |  |
| 6,418.4090            | 2,519.6367            | 6,080.6085             | 1,244.1977             |  |  |  |  |
| 17,817.4098           | 3,082.7453            | 6,152.6832             | 10,326.0438            |  |  |  |  |
| 6,308.1445            | 2,256.7017            | 8,169.3184             | 12,296.8400            |  |  |  |  |
| 4,898.0779            | 2,031.0359            | 3,104.1875             | 1,844.4820             |  |  |  |  |
| 15,286.8125           | 2,070.8395            | 9,390.5894             | 3,717.1985             |  |  |  |  |
| 5,400.9594            | 2,042.3296            |                        | 2,734.3837             |  |  |  |  |
| 8,118.5142            | 7,616.9621            |                        |                        |  |  |  |  |
| 35,119.8728           | 6,922.1285            |                        |                        |  |  |  |  |
| 5,091.9410            | 19,362.8004           |                        |                        |  |  |  |  |
| 26,158.6415           | 10,884.5942           |                        |                        |  |  |  |  |
| 9,449.3541            | 5,198.9335            |                        |                        |  |  |  |  |
| 16,543.7653           | 4,983.6948            |                        |                        |  |  |  |  |
| 12,926.1050           | 7,517.3059            |                        |                        |  |  |  |  |
| SPLCV_Exp1_-<br>δsat  | SPLCV_Exp1_+δ<br>sat  |                        |                        |  |  |  |  |
| 1,743.7772            | 708.6847              |                        |                        |  |  |  |  |
| 2,986.0032            | 839.8571              |                        |                        |  |  |  |  |
| 4,121.6320            | 469.5061              |                        |                        |  |  |  |  |
| 1,677.3872            | 234.1031              |                        |                        |  |  |  |  |
| 896.4007              | 764.3025              |                        |                        |  |  |  |  |
| 946.1991              | 627.7298              |                        |                        |  |  |  |  |
| 784.7014              | 614.3853              |                        |                        |  |  |  |  |
| 3,541.1445            | 514.4903              |                        |                        |  |  |  |  |
| 4,414.3950            | 374.8059              |                        |                        |  |  |  |  |
| 1,023.2905            | 427.8615              |                        |                        |  |  |  |  |
| 1,854.7384            | 907.6549              |                        |                        |  |  |  |  |
| 937.7113              | 375.0658              |                        |                        |  |  |  |  |

**Table S7.** Summary of statistical analyses performed to evaluate the effect of sweet potato leaf curl deltasatellite 1 on accumulation of different helper geminivirids.

| Virus   | Plant host   | Experiment | Genome component | $\delta$ sat | Passed normality test | Statistical test  | <i>p</i> -value |
|---------|--------------|------------|------------------|--------------|-----------------------|-------------------|-----------------|
| ToLCNDV | <i>N. b.</i> | Exp. 1     | DNA-A            | -            | Yes                   | Welch's t test    | 0.0006 ***      |
|         |              |            |                  | +            | Yes                   |                   |                 |
|         |              | Exp. 2     | DNA-B            | -            | Yes                   | Welch's t test    | 0.0037 **       |
|         |              |            |                  | +            | Yes                   |                   |                 |
|         |              |            | DNA-A            | -            | Yes                   | Welch's t test    | 0.0088 **       |
|         |              |            |                  | +            | Yes                   |                   |                 |
| ToLCNDV | Zucchini     | Exp. 1     | DNA-A            | -            | Yes                   | Welch's t test    | 0.4883 n.s.     |
|         |              |            |                  | +            | Yes                   |                   |                 |
|         |              |            | DNA-B            | -            | No                    | Mann-Whitney test | 0.9328 n.s.     |
|         |              |            |                  | +            | Yes                   |                   |                 |
|         |              | Exp. 2     | DNA-A            | -            | Yes                   | Welch's t test    | 0.2023 n.s.     |
|         |              |            |                  | +            | Yes                   |                   |                 |
| SiGYVV  | <i>N. b.</i> | Exp. 1     | DNA-A            | -            | Yes                   | Welch's t test    | <0.0001 ****    |
|         |              |            |                  | +            | Yes                   |                   |                 |
|         |              |            | DNA-B            | -            | Yes                   | Welch's t test    | 0.002 ***       |
|         |              |            |                  | +            | Yes                   |                   |                 |
|         |              | Exp. 2     | DNA-A            | -            | Yes                   | Mann-Whitney test | <0.0001 ****    |
|         |              |            |                  | +            | No                    |                   |                 |
| ToLDEV  | <i>N. b.</i> | Exp. 1     |                  | -            | Yes                   | Welch's t test    | <0001 ****      |
|         |              |            |                  | +            | Yes                   |                   |                 |
|         |              | Exp. 2     |                  | -            | Yes                   | Welch's t test    | <0001 ****      |
|         |              |            |                  | +            | Yes                   |                   |                 |
| BCTV    | <i>N. b.</i> | Exp. 1     |                  | -            | Yes                   | Welch's t test    | 0.3193 n.s.     |
|         |              |            |                  | +            | Yes                   |                   |                 |
|         |              | Exp. 2     |                  | -            | No                    | Mann-Whitney test | 0.6642 n.s.     |
|         |              |            |                  | +            | No                    |                   |                 |
| SPLCV   | <i>N. b.</i> | Exp. 1     |                  | -            | Yes                   | Welch's t test    | 0.0025 **       |
|         |              |            |                  | +            | Yes                   |                   |                 |

$\delta$ sat, deltasatellite; -, absence of the deltasatellite; +, presence of the deltasatellite. ToLCNDV, tomato leaf curl New Delhi virus; SiGYVV, Sida golden yellow vein virus; ToLDeV, tomato leaf deformation virus; BCTV, beet curly top virus; SPLCV, sweet potato leaf curl virus. *N. b.*, *Nicotiana benthamiana*.
